# Supplementary material for: Biobased homopolymers and amphiphilic diblock copolymers containing guaiacyl (G) or hydroxyphenyl (H) lignin derivatives synthesized by RAFT (PISA)
Source: Royal Society of Chemistry journal article supplement (doi:10.1039/d2py01221a), 2022-01-01
Supplement: d2py01221a1.pdf [file d2py01221a1.pdf]

## Supporting Information

### Biobased homopolymers and amphiphilic diblock copolymers containing guaiacyl (G) or hydroxyphenyl (H) lignin derivatives synthesized by RAFT (PISA)

Mauricio Balarezo, Fanny Coumes\* and François Stoffelbach\*

Sorbonne Université, CNRS, UMR 8232, Institut Parisien de Chimie Moléculaire (IPCM), Polymer Chemistry Team, 4 place Jussieu, 75252 Paris Cedex 05, France

E-mail: fanny.coumes@sorbonne-universite.fr; francois.stoffelbach@sorbonne-universite.fr

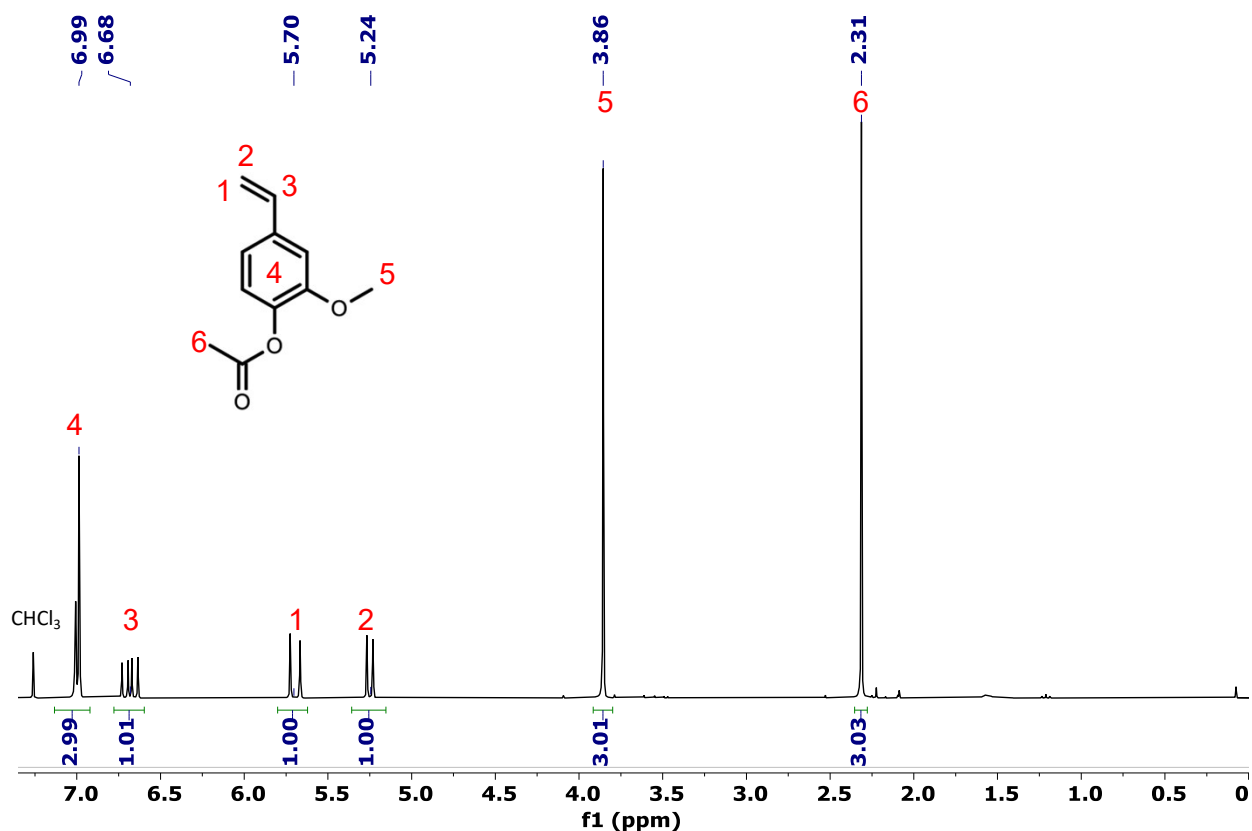

Figure S1. <sup>1</sup>H NMR spectrum of AcVG recorded in CDCl<sub>3</sub>.

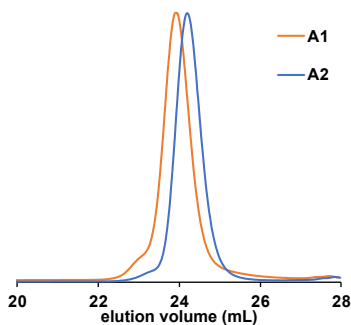

**Figure S2.** Normalized size exclusion chromatograms (RI) in THF of samples A1 (PAcVG) and A2 (PAcST).

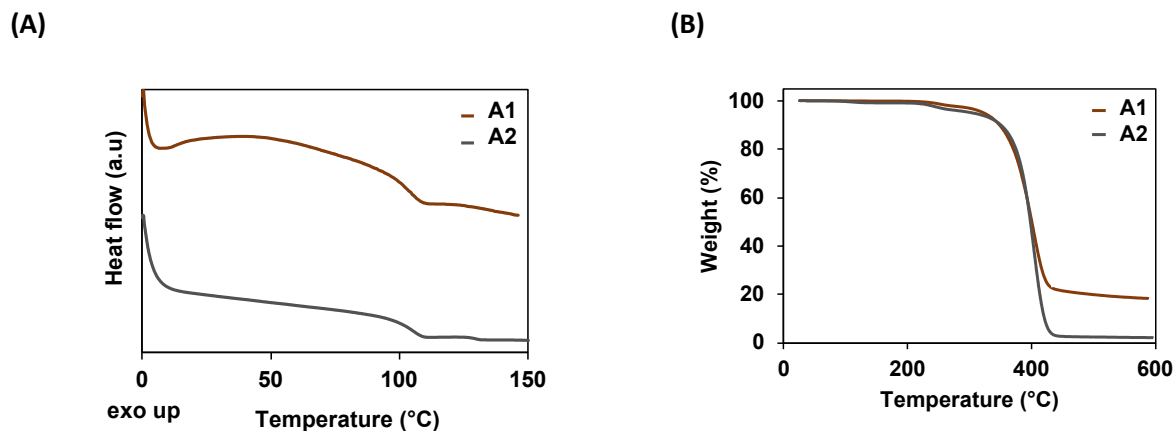

**Figure S3.** (A) DSC thermograms obtained during the 2<sup>nd</sup> heating under N<sub>2</sub> with a heating rate of 20 °C.min<sup>-1</sup> of: A1 (PAcVG) and A2 (PAcST). B). TGA thermograms obtained under N<sub>2</sub> with a heating rate of 20 °C.min<sup>-1</sup> of A1 (PAcVG) and A2 (PAcST).

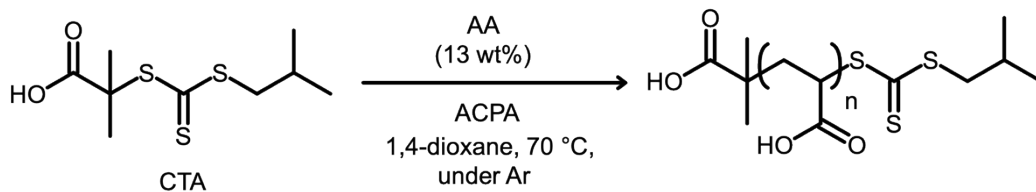

**Scheme S1.** RAFT polymerization of acrylic acid.

**Table S1.** Experimental conditions for the synthesis of PAA homopolymers in the presence of CTA and their characteristics<sup>#</sup>

| Sample | [AA] <sub>0</sub> /[CTA] <sub>0</sub> | Time (h) | Conv. <sup>a</sup><br>(%) | $M_{n,th}^b$<br>(kg/mol) | $DP_{n,NMR}^c$ | $M_{n,NMR}^c$<br>(kg/mol) | $M_{n,SEC}^d$<br>(kg/mol) | $\mathcal{D}^d$ |
|--------|---------------------------------------|----------|---------------------------|--------------------------|----------------|---------------------------|---------------------------|-----------------|
| M1     | 57/1                                  | 4        | 85                        | 3.8                      | 50             | 4.0                       | 4.5                       | 1.12            |
| M2     | 30/1                                  | 3        | 87                        | 2.1                      | 25             | 2.1                       | 3.1                       | 1.09            |

<sup>#</sup>Polymerizations were performed in 1,4-dioxane at 70 °C in presence of the RAFT agent CTA and ACPA as a radical initiator at 13 wt% of monomer at an initial molar ratio of CTA/ACPA: 1/0.1. <sup>a</sup> Determined by <sup>1</sup>H NMR analysis. <sup>b</sup> Determined from final conversion. <sup>c</sup> Determined by <sup>1</sup>H NMR analysis in DMSO-d<sub>6</sub> from end-chain. <sup>d</sup> Determined by SEC in THF for the methylated polymers with a PS calibration and recalculated for the nonmethylated ones.

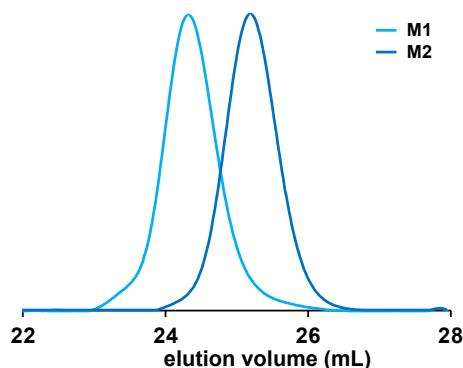

**Figure S4.** Normalized size exclusion chromatograms (RI) in THF of methylated samples M1 (PAA<sub>50</sub>-TTC) and M2 (PAA<sub>25</sub>-TTC).

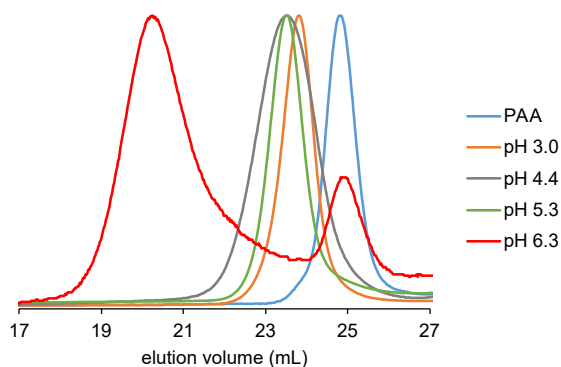

**Figure S5.** Normalized size exclusion chromatograms (RI) in THF of methylated PAA<sub>50</sub>-TTC (M1) and PAA-*b*-PAcVG obtained by PISA *via* aqueous RAFT emulsion polymerization at pH 3 (B1), 4.4 (B2), 5.3 (B3) and 6.3 (B4).

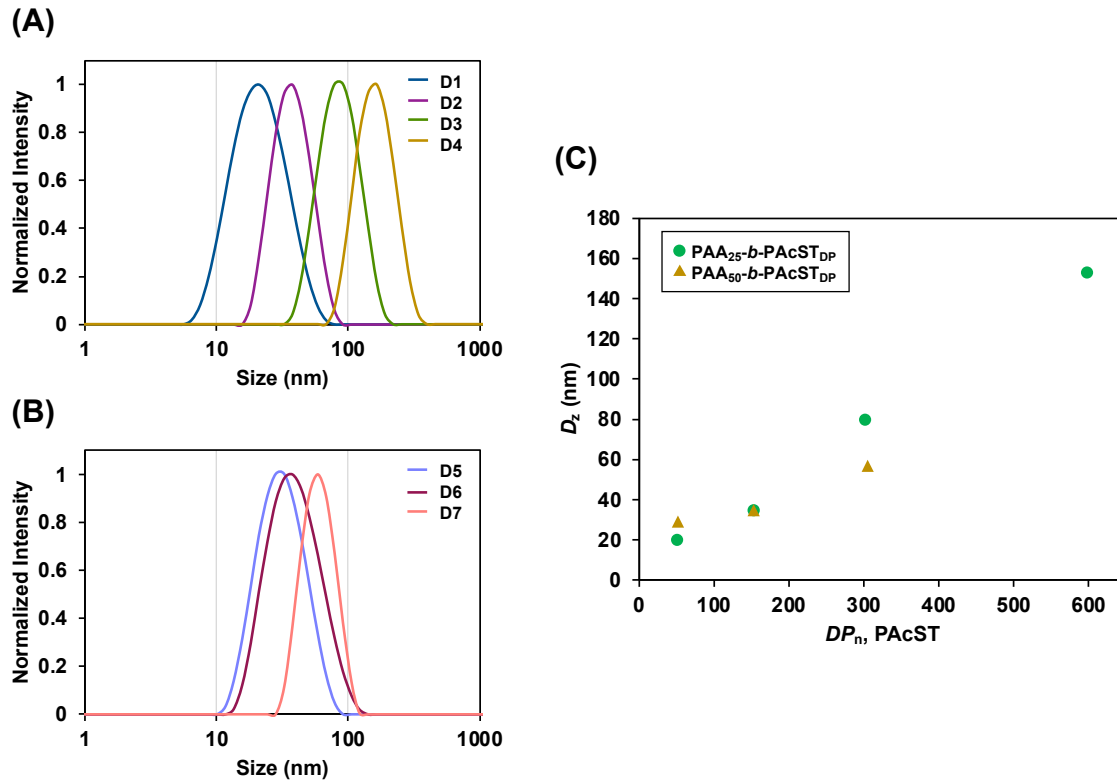

**Figure S6.** DLS distributions by intensity of (A) D1, D2, D3, D4 (B) D5, D6 and D7 latexes diluted at 1 wt%. (C) Z-average particle diameter ( $D_z$ ) as a function the hydrophobic block length,  $DP_{n, \text{PACST}}$  from PAA<sub>25</sub>-TTC (M2) (circle) and PAA<sub>50</sub>-TTC (M1) (triangle).

(A)

(B)

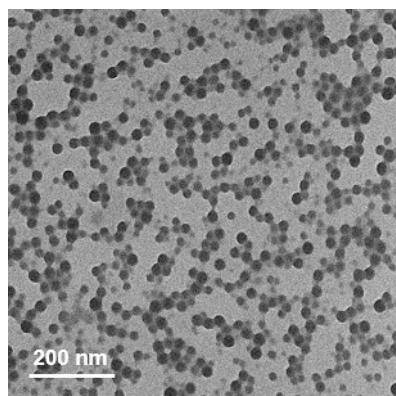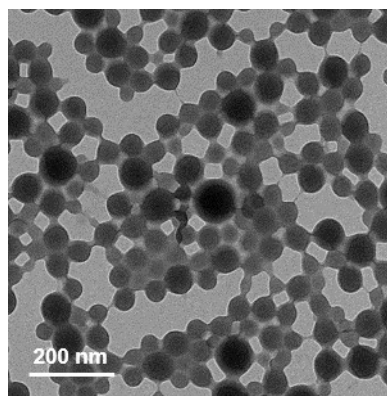

(C)

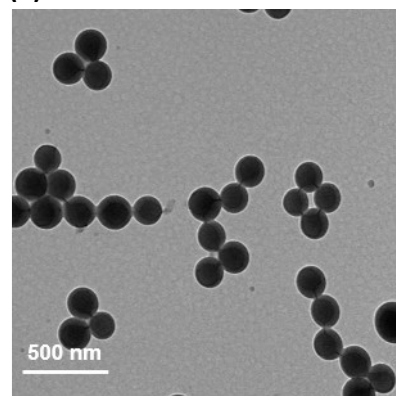

(D)

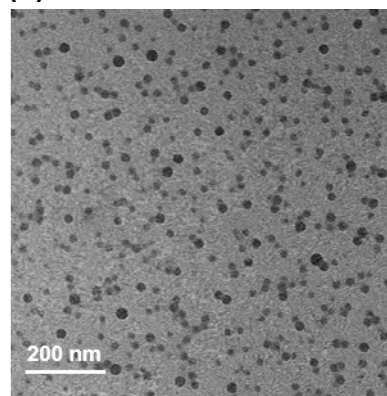

(E)

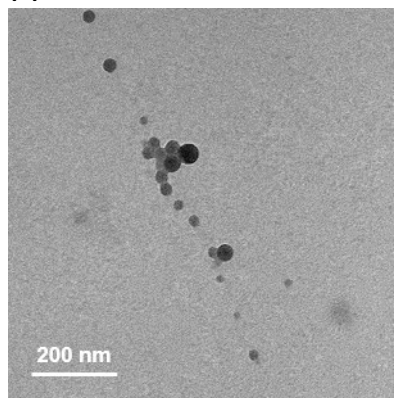

**Figure S7.** Representative TEM images prepared at room temperature for samples D2 (A), D3 (B), D4 (C), D6 (D) and D7 (E) from latexes diluted at 0.2 wt%.

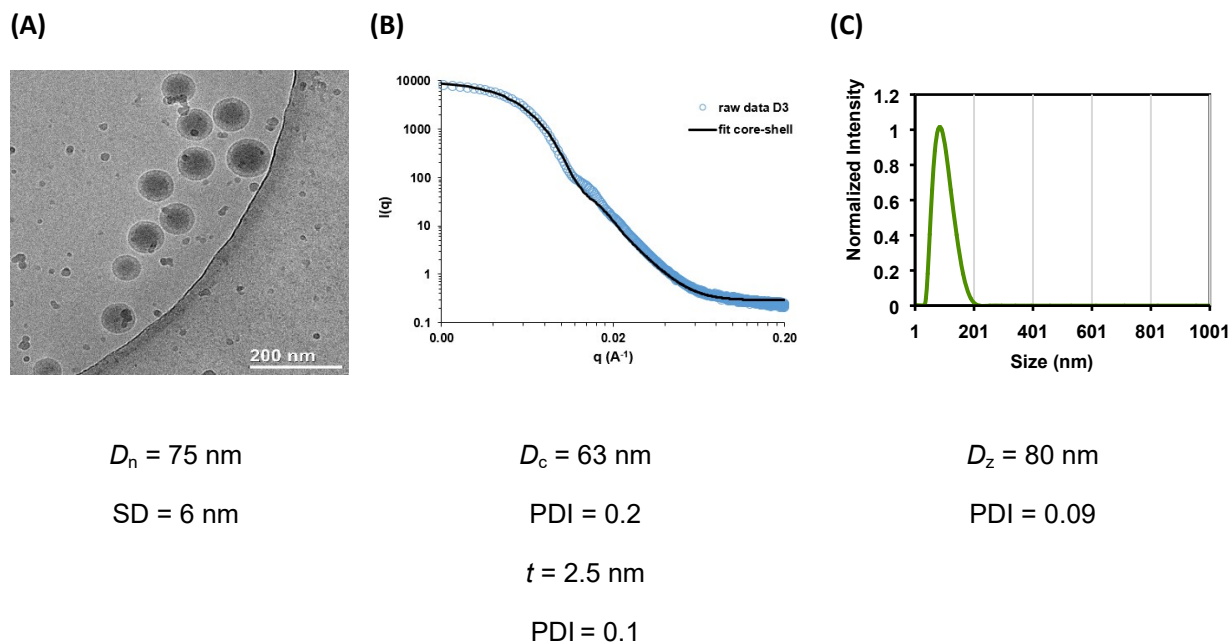

**Figure S8.** (A) Representative cryo-TEM image of sample D3 (diluted at 1 wt%) with  $D_n$ , the number-average diameter determined on 20 representative nano-objects and SD, the standard deviation. (B) SAXS profiles of *sample D3* (diluted 1 wt%) with  $D_c$ , the core diameter and  $t$ , the shell thickness using a sphere core-shell model and a lognormal distribution. (C) Normalized size distribution determined by DLS at 1 wt% in water for dispersion D3 with  $D_z$ , the Z-average particle diameter. PDI = polydispersity index.

## Determination of the blocking efficiency

The weight fraction of the residual methylated macro-RAFT agent in the methylated polymer was calculated from the RI peak area of the methylated macro-RAFT agent remaining unreacted during polymerization obtained by size exclusion chromatography with the online RI detector as follows:

$$F_{\text{residual macro-RAFT agent}} = \text{RI area}_{\text{residual macro-RAFT agent}} * n_0 / (C_{\text{polym.}} * dn/dC * V_{\text{inj.}} * K_{\text{RI}})$$

With

$n_0 = 1.405$ , the refractive index of THF

$K_{\text{RI}} = 1.58 * 10^6$ , the refractometer constant (mV)

$dn/dC = 0.067^{[1]}$ , the refractive index increment of methylated PAA (mL.g<sup>-1</sup>)

$C_{\text{polym}} = 5$ , the methylated polymer solution concentration (mg.mL<sup>-1</sup>)

$V_{\text{inj.}} = 0.1$ , the injection volume of the polymer solution (mL)

Note: In the RI chromatograms, the final copolymer peak overlapped with the unreacted macro-RAFT agent peak (Figures 3 and 5 in the main manuscript). Therefore, deconvolution of SEC data was necessary to determine the area of each RI peak. We used a method previously described in the literature.<sup>[1]</sup> Figure S9 shows an example of results obtained after deconvolution process (sample C5).

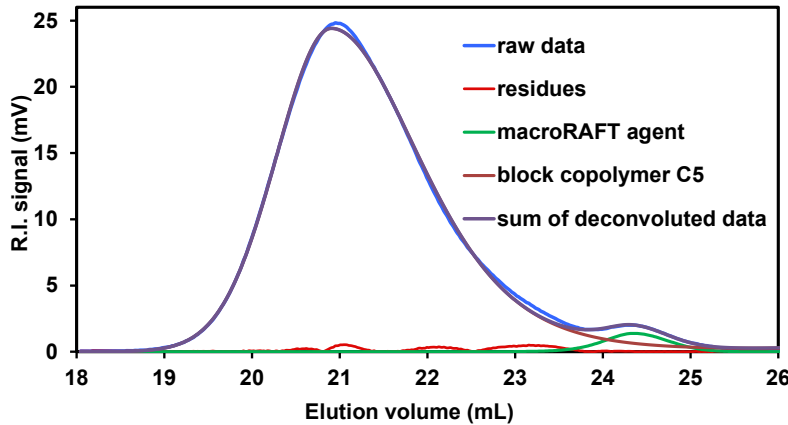

**Figure S9.** Result of deconvolution with an exponentially modified Gaussian model (Sample C5, Table 3).

The following equation has been used for the calculation of the blocking efficiency:

$$\text{Blocking efficiency (\%)} = (1 - F_{\text{residual macro-RAFT agent}} / F_{\text{macro-RAFT agent}}) * 100$$

With

$F_{\text{macro-RAFT agent}}$ , the weight fraction of methylated macro-RAFT agent in the methylated polymer.

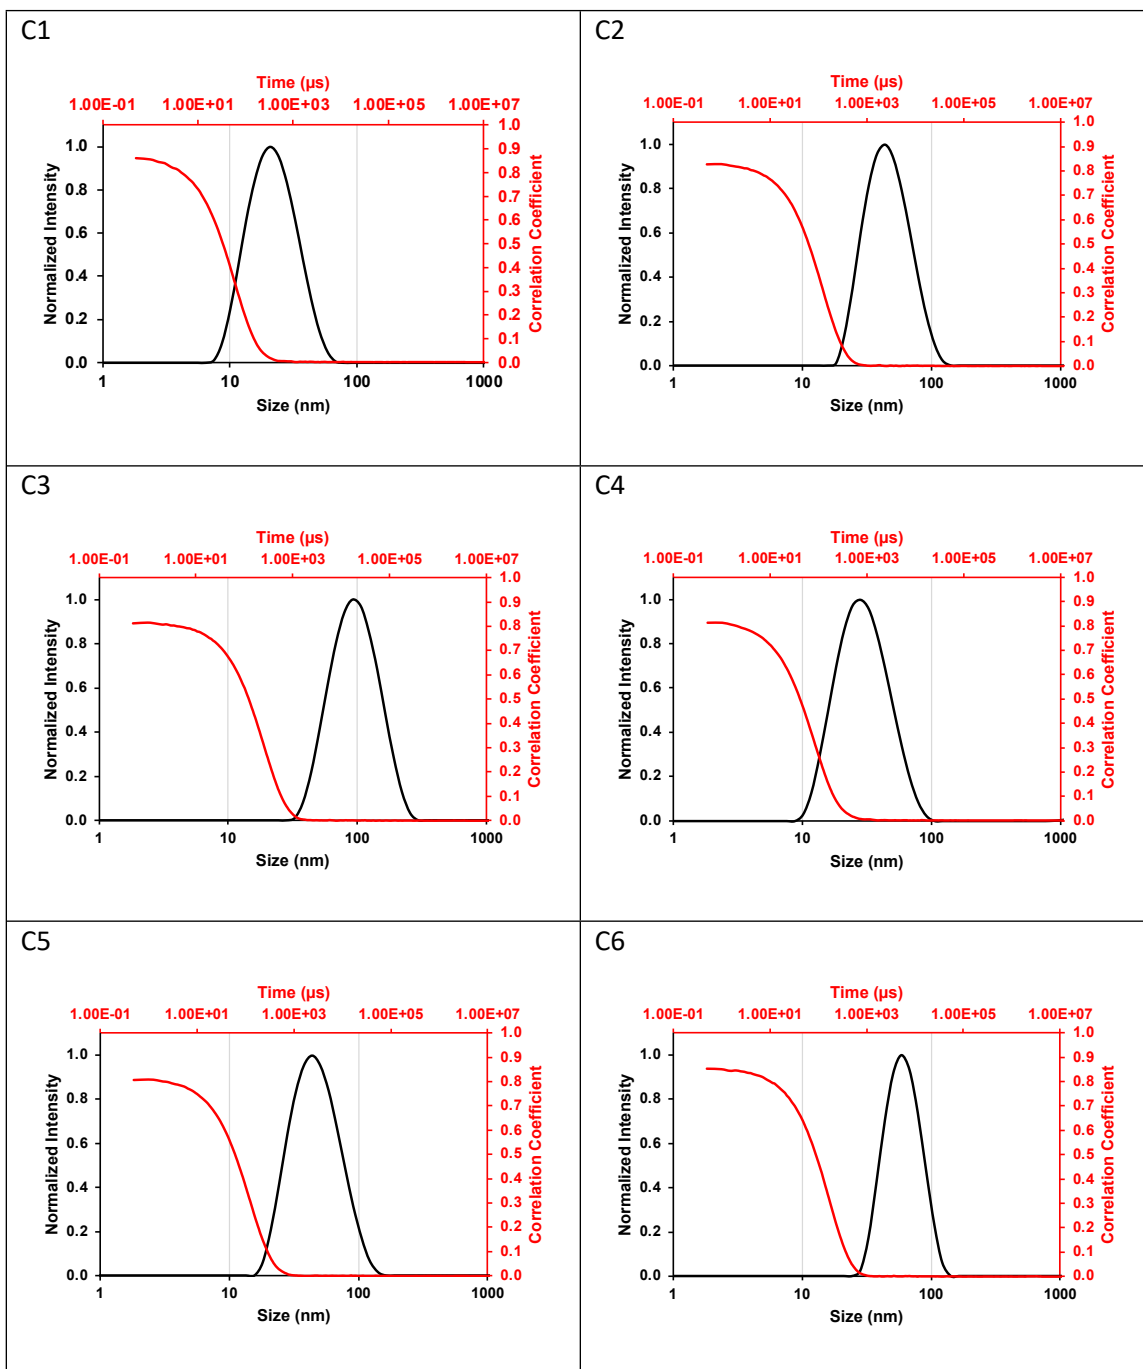

**Figure S10.** Normalized size distributions and correlograms obtained by DLS at 1 wt% in water for dispersions C1 to C6 (Table 3).

|    |    |
|----|----|
| D1 | D2 |
|----|----|



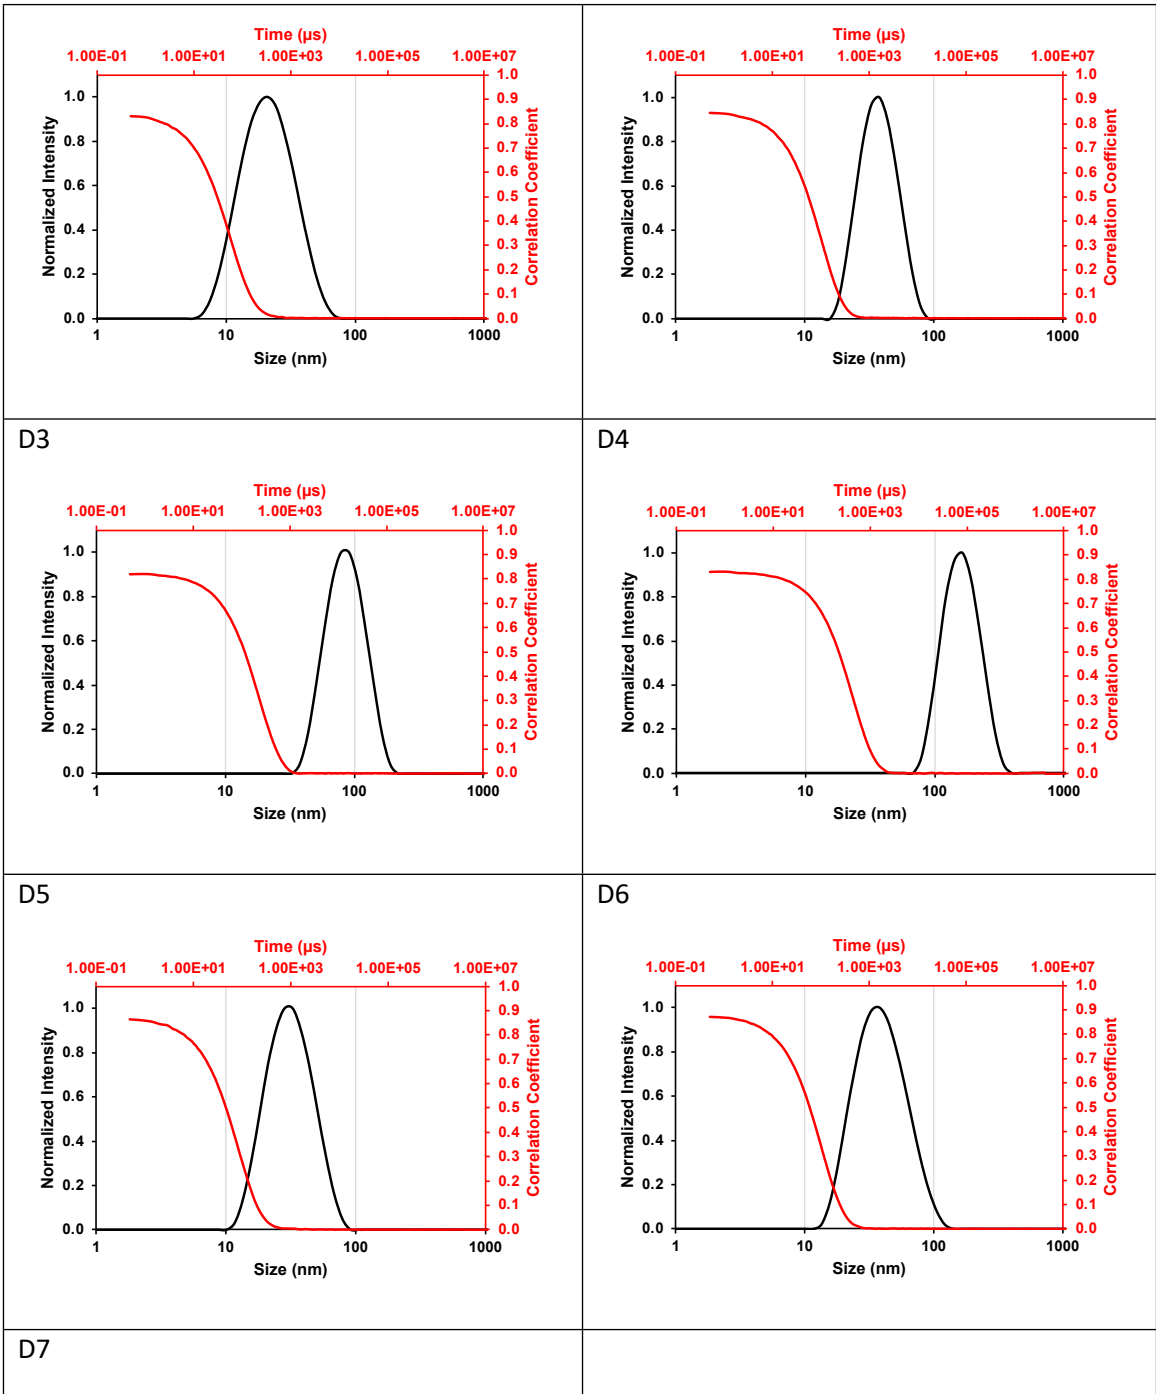

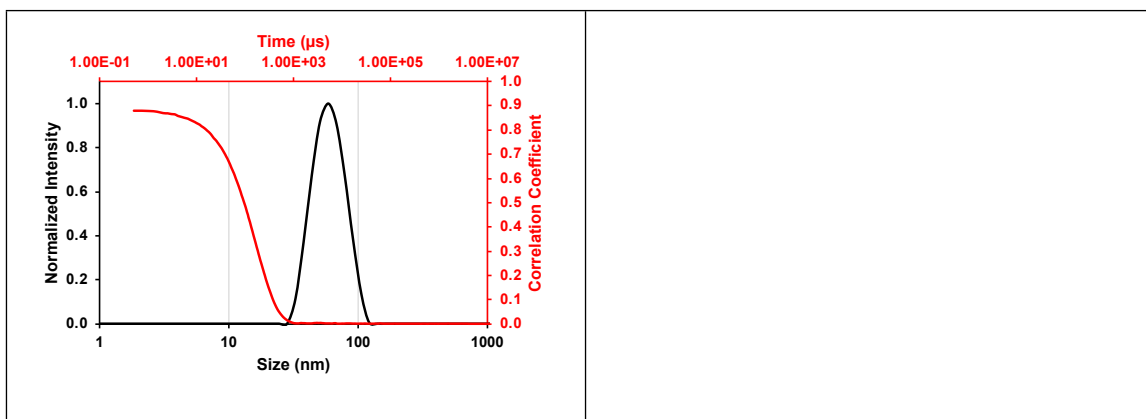

**Figure S11.** Normalized size distributions and correlograms obtained by DLS at 1 wt% in water for dispersions D1 to D7 (Table 4).

## Reference

- [1] E. Velasquez, G. Pemboung, J. Rieger, F. Stoffelbach, O. Boyron, B. Charleux, F. D'Agosto, M. Lansalot, P.-E. Dufils and J. Vinas, *Macromolecules*, 2013, 46, 664.
